# Supplementary material for: Baseline human gut microbiota profile in healthy people and standard reporting template
Source: PLoS One. 2019 Sep 11;14(9):e0206484. doi: 10.1371/journal.pone.0206484 (PMC6738582; doi:10.1371/journal.pone.0206484)
Supplement: S8 Table — The mapping was done by identifying UniProt Proteome IDs and the RPG cluster that best matched the organism described. (XLSX) [file pone.0206484.s012.xlsx]

## Sheet: Sheet1
uBiome Name	Proteome	Accessions from GFKB	Taxonomy
Akkermansia muciniphila	UP000001031	CP001071	349741
Anaerotruncus colihominis	UP000003803	NOT PRESENT	445972
Bacteroides fragilis	UP000002197	AP006841	295405
	UP000006731	CR626928	272559
	UP000008560	FQ312004	862962
Butyrivibrio crossotus	UP000018300	NOT PRESENT	1263062
Clostridium difficile	UP000001978	CP003939	272563
Collinsella aerofaciens	NOT PRESENT	NOT PRESENT	74426
Desulfovibrio piger	UP000003676	NOT PRESENT	411464
Dialister invisus	UP000017966	NOT PRESENT	1263072
Methanobrevibacter smithii	UP000001992	CP000678	420247
Oxalobacter formigenes	UP000003973	NOT PRESENT	556268
Ruminococcus albus	UP000004259	NOT PRESENT	246199
Salmonella enterica	UP000004642	NOT PRESENT	913241
Streptococcus sanguinis	UP000002148	NOT PRESENT	388919
Vibrio cholerae	UP000000584	NOT PRESENT	243277
Alistipes	UP000061809	CP012801	246787
	UP000063149	CP009057	357276
Barnesiella	UP000010099	CP003503	246198
Bifidobacterium	UP000000439	LN824140	206672
	UP000001360	AP010889	391904
	UP000002042	CP009045	552531
	UP000002312	CP001840	702459
	UP000002419	CP000605	205913
	UP000003323	AP012326	871562
	UP000006173	CP001361	484020
	UP000006740	CP002010	759350
	UP000006869	CP002220	883062
	UP000007063	FP929034	722911
	UP000007255	AP010888	565042
	UP000008150	AP010890	565040
	UP000008702	AP009256	367928
	UP000008938	CP002794	1035817
	UP000011835	CP004346	1254439
	UP000019336	CP006713	1385940
	UP000028581	CP007443	1680
	UP000028988	AP012327	1150460
	UP000030089	CP006741	1300227
	UP000030625	CP007456	1447716
	UP000031405	CP010437	1680
	UP000031657	AP014658	216816
	UP000066721	CP010412	1681
	UP000232402	CP011964	216816
	UP000232467	CP006715	1685
	UP000232637	CP002286	216816
Campylobacter	UP000002407	CP000776	360107
	UP000066984	CP007180	195
Clostridium	UP000001978	CP003939	272563
Escherichia-Shigella	UP000000318	CP001396	83333
	UP000000625	CP009789	83333
	UP000001410	CP007799	199310
	UP000001952	CP000243	364106
	UP000002032	CP010816	469008
	UP000006167	CP004009	1133852
	UP000006877	CP010371	316401
	UP000007011	CP000970	439855
	UP000007097	CP007394	585056
	UP000008464	CP002729	696406
	UP000008614	CU651637	685038
	UP000030317	CP009859	562
	UP000031758	CP009167	745156
	UP000032727	HG941718	941322
	UP000193045	CP002291	656397
Fusobacterium	UP000002521	NOT PRESENT	190304
Lactobacillus	UP000001279	CP003032	1069534
	UP000004525	CP003094	525361
	UP000006381	CP005926	272621
	UP000015561	AP012541	1226298
Odoribacter	UP000006657	CP002544	709991
Prevotella	UP000000927	CP002006	264731
	UP000001498	CP002122	553174
	UP000008137	CP002589	767031
	UP000010099	CP003503	246198
	UP000010862	CP003369	908937
	UP000015929	CP003666	575614
	UP000217431	AP014597	28131
Roseburia	UP000008178	CP003040	585394
	UP000008807	FP929049	657315
	UP000008953	FP929050	718255
Ruminococcus	UP000007054	FP929052	213810
	UP000007055	FP929053	657323
	UP000027600	HF545617	1160721
	UP000198616	FP929051	40518
Salmonella	UP000276345	NOT PRESENT	1160765
Veillonella	UP000007968	CP001820	479436
